# Supplementary material
Source: PubMed Central journal article supplement (PMC6248195)
Supplement: jamainternmed-178-1458-s001.pdf [file jamainternmed-178-1458-s001.pdf]

## Supplementary Online Content

Sinha MS, Najafzadeh M, Rajasingh EK, Love J, Kesselheim AS. Labeling changes and costs for clinical trials performed under the US Food and Drug Administration pediatric exclusivity extension, 2007 to 2012. *JAMA Intern Med*. Published online September 24, 2018. doi:10.1001/jamainternmed.2018.3933

### eMethods

**eFigure 1.** Annual Number of Pediatric Exclusivity Awards, 1998 – 2016

**eFigure 2.** Time periods used when calculating net economic return

**eTable 1.** Consumer Price Index, All Urban Consumers, 2003-2017 (Source: <https://www.bls.gov/cpi/data.htm>)

**eTable 2.** Estimated Locally-Based Per Patient Costs by Selected Disease Areas and Phase

**eTable 3.** Average annual growth rates of clinical trial costs: alternative models and periods, 1989-2011 (in percent)

**eTable 4.** Components of Total Trials Conducted for Each Drug in Conjunction with Pediatric Written Request

**eTable 5.** Pediatric Exclusivity grants, Food and Drug Administration, September 27, 2007 – December 31, 2012

**eTable 6.** Estimated Cost to Consumers (Net Return) and Ratio of Net Return to Cost of Investment for 48 Pediatric Exclusivity Extensions with Revenue Data (Listed in Order of Pediatric Exclusivity Grant Date)

This supplementary material has been provided by the authors to give readers additional information about their work.

## **APPENDIX**

### **Labeling Changes and Costs Emerging from Clinical Trials Performed under the FDA Pediatric Exclusivity Extension from 2007 to 2012**

**Sinha MS, Najafzadeh M, Rajasingh EK, Love J, Kesselheim AS**

#### **INDEX OF ITEMS**

**Pg 2: Methodology details**

**Pg 5: eFigure 1: Annual Number of Pediatric Exclusivity Awards, 1998 – 2016**

**Pg 6: eFigure 2. Time periods used when calculating net economic return**

**Pg 7: eTable 1: Consumer Price Index, All Urban Consumers, 2003-2017 (Source:  
<https://www.bls.gov/cpi/data.htm>)**

**Pg 8: eTable 2: Estimated Locally-Based Per Patient Costs by Selected Disease Areas  
and Phase**

**Pg 9: eTable 3: Average annual growth rates of clinical trial costs: alternative models  
and periods, 1989-2011 (in percent)**

**Pg 10: eTable 4: Components of Total Trials Conducted for Each Drug in Conjunction  
with Pediatric Written Request**

**Pg 12: eTable 5: Pediatric Exclusivity grants, Food and Drug Administration,  
September 27, 2007 – December 31, 2012**

**Pg 18: eTable 6: Estimated Cost to Consumers (Net Return) and Ratio of Net Return  
to Cost of Investment for 48 Pediatric Exclusivity Extensions with Revenue Data  
(Listed in Order of Pediatric Exclusivity Grant Date)**

## **Methodology details**

### **Exceptions to Clinical Trial Data:**

We obtained clinical trial data from FDA Clinical Review documents for the respective written requests:

- Pediatric trial phase was not adequately described in clinical review documents for twelve drugs (anastrozole [Arimidex], aripiprazole [Abilify], bivalirudin [Angiomax], clopidogrel [Plavix], colesevelam [Welchol], famciclovir [Famvir], levocetirizine [Xyzal], olmesartan [Benicar], olopatadine [Patanol], quetiapine [Seroquel], rizatriptan [Maxalt], and saquinavir [Fortovase]). For each, we queried ClinicalTrials.gov for phase information using the study or protocol number listed in the clinical review document.
- Five drugs (bendamustine [Treanda], tenofovir [Viread], lopinavir-ritonavir [Kaletra], technetium Tc99m sestamibi [Cardiolite] and temsirolimus [Torisel]) conducted at least one unified Phase 1/2 study; these were coded as Phase 2 for our analysis unless enrollment differed between Phase 1 and Phase 2 (bendamustine [Treanda] and temsirolimus [Torisel]).
- Supplemental studies, conducted and submitted by the sponsor but not originally requested in the PWR, were excluded. This included studies for eight drugs.
  - Four referenced previous studies (gatifloxacin [Zymar] referenced a study submitted for its NDA; levetiracetam [Keppra] referenced previously submitted studies; olopatadine [Patanol] referenced studies of an earlier formulation of the drug; and rizatriptan [Maxalt] referenced five previously-completed Phase 3 trials in adolescents).
  - Four drugs conducted additional studies not requested in the PWR (clopidogrel [Plavix] conducted an additional Phase 1 study; fosamprenavir [Lexiva] conducted an additional Phase 2 study; nitric oxide [INOMax] conducted an additional Phase 3 study; and pantoprazole [Protonix] conducted four additional Phase 2 studies).
- Trials consisting entirely of adults, submitted for pediatric exclusivity determinations, were excluded. This was the case for four drugs (alfuzosin [Uroxatral], bicalutamide [Casodex], candesartan [Atacand], and darunavir [Prezista]).
- Lansoprazole [Pepcid] received pediatric exclusivity based on four trials conducted over a period of 6 years; in the absence of information on the previous trials, we consider only the pivotal Phase 3 trial identified in the FDA review documents.
- Sildenafil [Revatio] completed one Phase 3 trial and was partway through an open-label phase 3 trial when the research protocol was terminated to due adverse events. We consider only enrollees of this first trial (the same patients were continued in the subsequent open-label trial).
- The original Written Request for aripiprazole [Aricept] detailed 4 studies, but only three were reviewed in the initial Clinical Review; we include all four studies (Studies 31-03-238, 31-03-239, 31-03-240 and 31-03-241).

## Exceptions to Pediatric Exclusivity Period:

In the case of litigation and settlements redefining the date of generic entry, that date became the final day of brand exclusivity, defining a new end date of the six-month window for our calculations. We focused on generic entry for the base drug; this does not include reformulations or combination products, for which exclusivity periods may be longer.

## Exceptions to Revenue Data Determinations:

We obtained drug revenue data from publicly available corporate annual reports, including filings with the US Securities and Exchange Commission and quarterly financial results from brand manufacturers.

- Six drugs did not have readily available revenue figures (ixabepilone [Ixempra], loteprednol/tobramycin [Zylet], rocuronium [Zemuron], saquinavir [Invirase], temsirolimus [Torisel], and tipranavir [Aptivus]) and were excluded.
- For five drugs (almotriptan [Axert],<sup>1</sup> gatifloxacin [Zymar],<sup>2</sup> olmesartan [Benicar],<sup>3</sup> olopatadine [Patanol],<sup>4</sup> and tamsulosin [Flomax]<sup>5</sup>), we extracted information on revenues from press releases by generic manufacturers entering the market, which provided IMS Health revenue data.
  - IMS revenues for olmesartan [Benicar] exclude revenues for olmesartan-HCTZ [Benicar-HCT], which earned an additional \$805 million over the same time period.
- For valacyclovir [Valtrex], the market exclusivity end-date was close enough to the end of the calendar year (December 23) to justify using that year's revenue data.
- Recent corporate revenue filings grouped two or more of the drugs with combination drugs that included the same base compound (bendamustine [Treanda], darunavir [Prezista], and quetiapine [Seroquel]).
  - Annual revenues for 2016 included two formulations of bendamustine [Treanda & Bendeka], while darunavir's 2016 revenues included revenues for 2 formulations of darunavir/cobicistat [Prezcobix & Rezolsta]. We also combined revenues from ER and IR formulations of quetiapine.
- For eplerenone [Inspra], we used 2014 revenues (later revenues were unavailable).
- In 2010, both Bristol-Myers Squibb and Sanofi-Aventis generated revenue from clopidogrel [Plavix]. Rather than pooling the two, we used 2010 revenues from Bristol-Myers Squibb, the primary patent holder and funder of pediatric research.
- Finally, for technetium Tc99m sestamibi [Cardiolite], revenues were extrapolated from first quarter through third quarter revenues (just prior to divestment of the product by Bristol-Myers Squibb).

---

<sup>1</sup> <http://newsroom.mylan.com/2015-11-17-Mylan-Launches-Generic-AXERT-Tablets>

<sup>2</sup> <http://www.prnewswire.com/news-releases/lupin-launches-generic-zymaxid-ophthalmic-solution-in-the-us-226301061.html>

<sup>3</sup> <http://newsroom.mylan.com/2016-10-26-Mylan-Launches-First-Generics-of-Benicar-and-Benicar-HCT-Tablets>

<sup>4</sup> <http://www.pharmacytimes.com/product-news/generic-patanol-for-seasonal-allergic-conjunctivitis-approved>

<sup>5</sup> <https://www.fiercepharma.com/pharma/actavis-launches-generic-version-of-flomax-r-u-s>

For 10 drugs, corporate revenues were reported in foreign currencies, so we converted to US dollars using the conversion rate on January 1 of the year pediatric exclusivity ended using the website X-Rates.com (<http://www.x-rates.com/historical/>). Relevant drugs and their original revenue currencies:

**GBP:** fosamprenavir [Lexiva], valacyclovir [Valtrex], albuterol [Ventolin HFA]

**EUR:** alfuzosin [Uroxatral], clopidogrel [Plavix], docetaxel [Taxotere], levetiracetam [Keppra], levocetirizine [Xyzal]

**JPY:** eszopiclone [Lunesta], lansoprazole [Prevacid]

**eFigure 1: Annual Number of Pediatric Exclusivity Awards, 1998 – 2016**

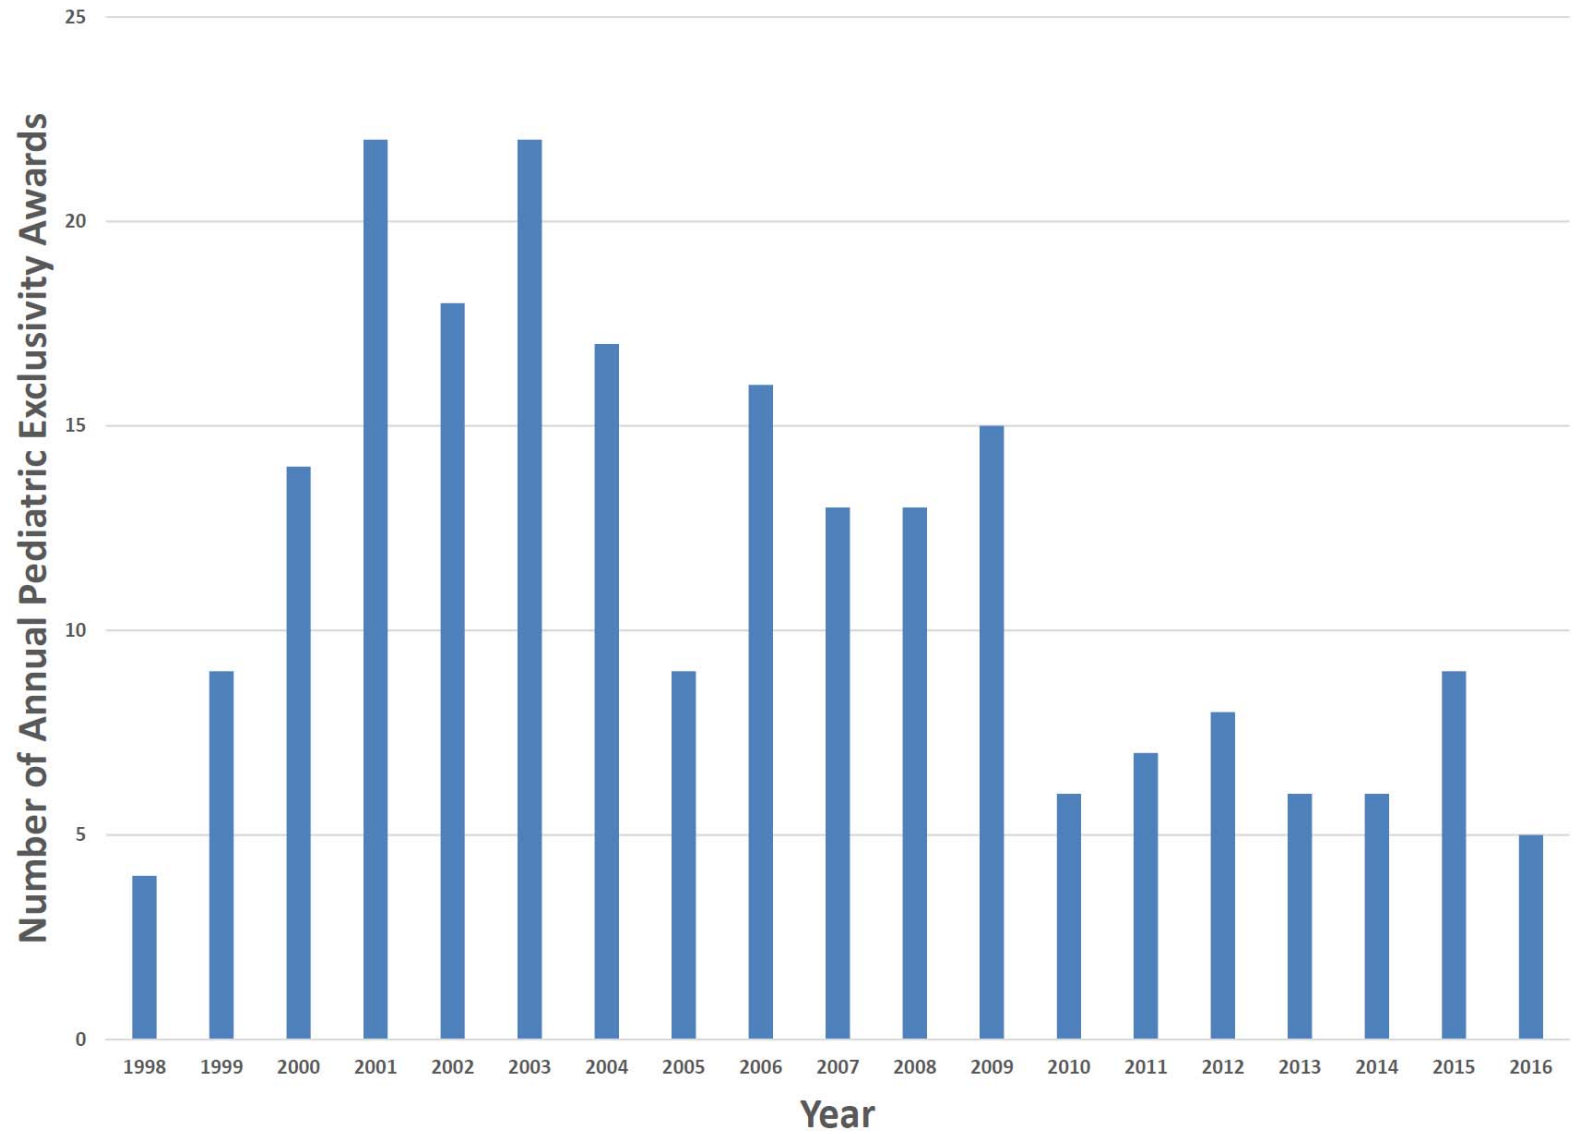

**eFigure 2. Time periods used when calculating net economic return.**

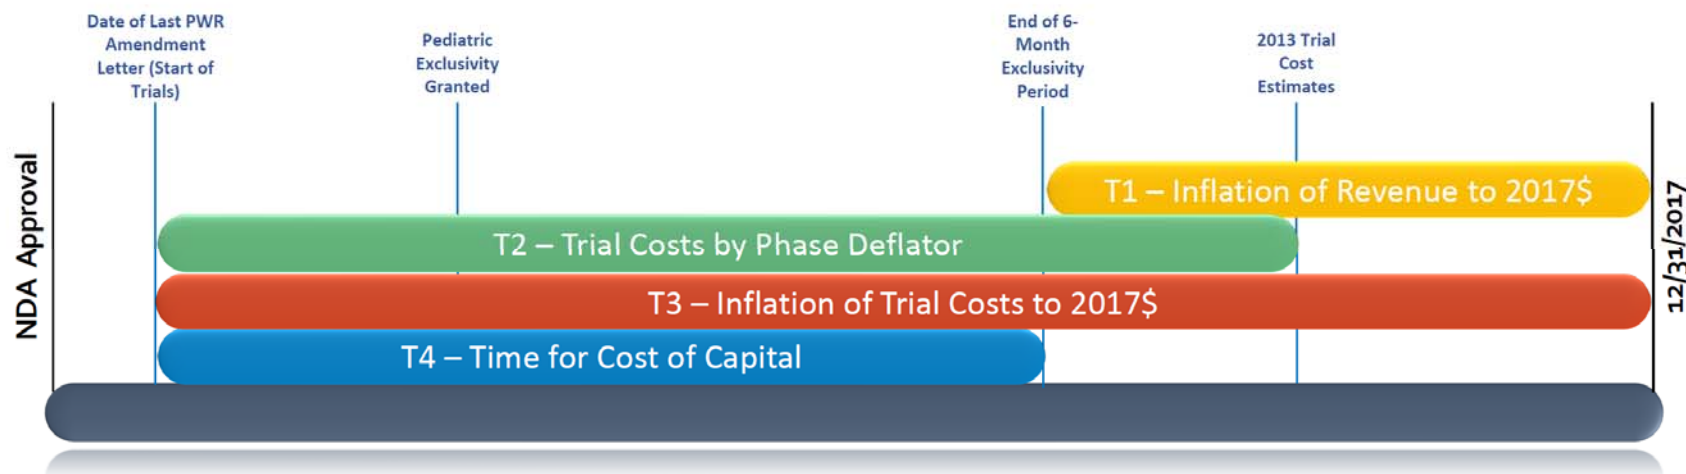

**Legend:** Of note, time period T1 varies and may begin before or after the 2013 estimate of clinical trial costs. Where the pediatric exclusivity period ends after 12/31/2017, T1 = 0 and T4 will extend to 12/31/2017.

**eTable 1: Consumer Price Index, All Urban Consumers, 2003-2017 (Source: <https://www.bls.gov/cpi/data.htm>)**

**CPI-All Urban Consumers (Current Series)**

**Series Id:** CUUR0000SA0  
 Not Seasonally Adjusted  
**Series Title:** All items in U.S. city average, all urban consumers, not seasonally adjusted  
**Area:** U.S. city average  
**Item:** All items  
**Base Period:** 1982-84=100

| Year        | Jan     | Feb     | Mar     | Apr     | May     | Jun     | Jul     | Aug     | Sep     | Oct     | Nov     | Dec     | Annual  | HALF1   | HALF2   |
|-------------|---------|---------|---------|---------|---------|---------|---------|---------|---------|---------|---------|---------|---------|---------|---------|
| <b>2007</b> | 202.416 | 203.499 | 205.352 | 206.686 | 207.949 | 208.352 | 208.299 | 207.917 | 208.490 | 208.936 | 210.177 | 210.036 | 207.342 | 205.709 | 208.976 |
| <b>2008</b> | 211.080 | 211.693 | 213.528 | 214.823 | 216.632 | 218.815 | 219.964 | 219.086 | 218.783 | 216.573 | 212.425 | 210.228 | 215.303 | 214.429 | 216.177 |
| <b>2009</b> | 211.143 | 212.193 | 212.709 | 213.240 | 213.856 | 215.693 | 215.351 | 215.834 | 215.969 | 216.177 | 216.330 | 215.949 | 214.537 | 213.139 | 215.935 |
| <b>2010</b> | 216.687 | 216.741 | 217.631 | 218.009 | 218.178 | 217.965 | 218.011 | 218.312 | 218.439 | 218.711 | 218.803 | 219.179 | 218.056 | 217.535 | 218.576 |
| <b>2011</b> | 220.223 | 221.309 | 223.467 | 224.906 | 225.964 | 225.722 | 225.922 | 226.545 | 226.889 | 226.421 | 226.230 | 225.672 | 224.939 | 223.598 | 226.280 |
| <b>2012</b> | 226.665 | 227.663 | 229.392 | 230.085 | 229.815 | 229.478 | 229.104 | 230.379 | 231.407 | 231.317 | 230.221 | 229.601 | 229.594 | 228.850 | 230.338 |
| <b>2013</b> | 230.280 | 232.166 | 232.773 | 232.531 | 232.945 | 233.504 | 233.596 | 233.877 | 234.149 | 233.546 | 233.069 | 233.049 | 232.957 | 232.366 | 233.548 |
| <b>2014</b> | 233.916 | 234.781 | 236.293 | 237.072 | 237.900 | 238.343 | 238.250 | 237.852 | 238.031 | 237.433 | 236.151 | 234.812 | 236.736 | 236.384 | 237.088 |
| <b>2015</b> | 233.707 | 234.722 | 236.119 | 236.599 | 237.805 | 238.638 | 238.654 | 238.316 | 237.945 | 237.838 | 237.336 | 236.525 | 237.017 | 236.265 | 237.769 |
| <b>2016</b> | 236.916 | 237.111 | 238.132 | 239.261 | 240.229 | 241.018 | 240.628 | 240.849 | 241.428 | 241.729 | 241.353 | 241.432 | 240.007 | 238.778 | 241.237 |
| <b>2017</b> | 242.839 | 243.603 | 243.801 | 244.524 | 244.733 | 244.955 | 244.786 | 245.519 | 246.819 | 246.663 | 246.669 | 246.524 | 245.120 | 244.076 | 246.163 |

**Inflation Rate for Conversion to 2017 Dollars**

An average annual inflation rate “i” from 2007 to 2017 was calculated as follows:

$$(2017 \text{ average annual CPI}) = (2007 \text{ average annual CPI}) \times (1 + i)^{10}; i = 0.0169.$$



**eTable 2: Estimated Locally-Based Per Patient Costs by Selected Disease Areas and Phase**

| Disease Area                      | Phase 0* | Phase I  | Phase II | Phase III | Phase IV | Avg. All Phases |
|-----------------------------------|----------|----------|----------|-----------|----------|-----------------|
| Cardiovascular/Circulatory        | \$9,500  | \$21,500 | \$25,000 | \$26,000  | \$9,500  | \$20,500        |
| Central Nervous System/Brain/Pain | \$15,000 | \$34,000 | \$39,500 | \$40,500  | \$15,000 | \$36,000        |
| Diabetes/Metabolic/Nutrition      | \$7,000  | \$16,000 | \$18,500 | \$19,000  | \$7,000  | \$17,500        |
| Hematology                        | \$11,500 | \$26,000 | \$30,000 | \$31,000  | \$11,500 | \$26,000        |
| Infectious                        | \$6,500  | \$15,000 | \$17,500 | \$18,000  | \$6,500  | \$16,500        |
| Oncology                          | \$25,500 | \$57,500 | \$67,500 | \$69,000  | \$25,500 | \$59,500        |
| Respiratory                       | \$11,500 | \$26,000 | \$30,500 | \$31,000  | \$11,500 | \$30,000        |
| Other                             | \$13,000 | \$29,500 | \$34,500 | \$35,000  | \$13,000 | \$30,500        |
| <b>Avg. All Diseases</b>          | \$16,500 | \$38,500 | \$40,000 | \$42,000  | \$16,500 | \$36,500        |

Source: <http://phrma-docs.phrma.org/sites/default/files/pdf/biopharmaceutical-industry-sponsored-clinical-trials-impact-on-state-economies.pdf>

**eTable 3: Average annual growth rates of clinical trial costs: alternative models and periods, 1989-2011 (in percent)**

| Model and phase                        | Pooled 1989–2011 |           |           | 1989–1999 | 2000–2011 |
|----------------------------------------|------------------|-----------|-----------|-----------|-----------|
|                                        | 1989–2011        | 1989–1999 | 2000–2011 |           |           |
| <b>Base model</b>                      |                  |           |           |           |           |
| <b>U.S. only</b>                       | 7.01             | 5.80      | 8.01      | 5.70      | 7.38      |
| <b>Rest of world</b>                   | 8.70             | 6.66      | 10.39     | 6.54      | 12.36     |
| <b>With SWE and LPATIENTS by phase</b> |                  |           |           |           |           |
| <b>U.S. only</b>                       |                  |           |           |           |           |
| <b>Phase I</b>                         | 6.78             | 5.72      | 7.66      | 5.07      | 8.58      |
| <b>Phase II</b>                        | 6.00             | 7.77      | 4.52      | 7.61      | 4.32      |
| <b>Phase IIIa</b>                      | 3.78             | 4.33      | 3.32      | 3.68      | 2.93      |
| <b>Phase IIIb</b>                      | 3.48             | 3.92      | 3.11      | 4.24      | 3.34      |
| <b>Phase IV</b>                        | 6.43             | 8.02      | 5.11      | 7.80      | 4.03      |
| <b>Rest of world</b>                   |                  |           |           |           |           |
| <b>Phase I</b>                         | 15.51            | 11.69     | 18.70     | 10.62     | 23.96     |
| <b>Phase II</b>                        | 7.64             | 8.48      | 6.95      | 8.65      | 9.52      |
| <b>Phase IIIa</b>                      | 6.29             | 6.87      | 5.81      | 6.30      | 7.87      |
| <b>Phase IIIb</b>                      | 12.29            | 15.54     | 9.59      | 13.72     | 11.55     |

**Source: <https://www.bls.gov/opub/mlr/2014/article/price-indexes-for-clinical-trial-research-a-feasibility-study.htm>**

**eTable 4: Components of Total Trials Conducted for Each Drug in Conjunction with each Written Request for Pediatric Studies**

| Drug                       | # Trials (Total) | # Patients (Total) | # Phase I Trials | # Patients in Phase I | # Phase II Trials | # Patients in Phase II | # Phase III Trials | # Patients in Phase III | # Phase IV Trials | # Patients in Phase IV |
|----------------------------|------------------|--------------------|------------------|-----------------------|-------------------|------------------------|--------------------|-------------------------|-------------------|------------------------|
| Eplerenone                 | 4                | 576                | 2                | 38                    |                   |                        | 2                  | 538                     |                   |                        |
| Aripiprazole               | 4                | 915                | 1                | 21                    |                   |                        | 3                  | 894                     |                   |                        |
| Anastrozole                | 4                | 174                | 2                | 66                    | 1                 | 28                     | 1                  | 80                      |                   |                        |
| Divalproex                 | 3                | 522                |                  |                       |                   |                        | 3                  | 522                     |                   |                        |
| Zoledronic acid            | 2                | 166                | 1                | 11                    |                   |                        | 1                  | 155                     |                   |                        |
| Technetium Tc99m sestamibi | 3                | 956                |                  |                       | 1                 | 78                     | 2                  | 878                     |                   |                        |
| Ezetimibe                  | 2                | 266                | 1                | 18                    |                   |                        | 1                  | 248                     |                   |                        |
| Valacyclovir               | 3                | 112                | 1                | 57                    |                   |                        | 2                  | 55                      |                   |                        |
| Lopinavir/ Ritonavir       | 2                | 57                 |                  |                       | 2                 | 57                     |                    |                         |                   |                        |
| Tipranavir                 | 1                | 110                |                  |                       | 1                 | 110                    |                    |                         |                   |                        |
| Rocuronium                 | 2                | 356                |                  |                       |                   |                        | 2                  | 356                     |                   |                        |
| Caspofungin                | 5                | 197                | 3                | 66                    | 2                 | 131                    |                    |                         |                   |                        |
| Levetiracetam              | 3                | 469                |                  |                       | 1                 | 98                     | 2                  | 371                     |                   |                        |
| Lansoprazole               | 1                | 162                |                  |                       |                   |                        | 1                  | 162                     |                   |                        |
| Topiramate                 | 5                | 568                | 3                | 135                   |                   |                        | 2                  | 433                     |                   |                        |
| Valganciclovir             | 4                | 133                | 3                | 109                   | 1                 | 24                     |                    |                         |                   |                        |
| Albuterol                  | 3                | 250                |                  |                       |                   |                        | 3                  | 250                     |                   |                        |
| Bicalutamide               | 1                | 14                 |                  |                       | 1                 | 14                     |                    |                         |                   |                        |
| Almotriptan                | 3                | 1176               | 1                | 36                    |                   |                        | 2                  | 1140                    |                   |                        |
| Quetiapine                 | 4                | 1070               | 1                | 28                    |                   |                        | 3                  | 1042                    |                   |                        |
| Pantoprazole               | 8                | 567                |                  |                       | 3                 | 122                    | 5                  | 445                     |                   |                        |
| Colesevelam                | 1                | 194                |                  |                       |                   |                        |                    |                         | 1                 | 194                    |
| Risedronate                | 2                | 175                | 1                | 28                    |                   |                        | 1                  | 147                     |                   |                        |
| Esomeprazole               | 3                | 217                | 2                | 119                   |                   |                        | 1                  | 98                      |                   |                        |
| Gatifloxacin               | 1                | 171                |                  |                       |                   |                        | 1                  | 171                     |                   |                        |

|                        |     |        |    |      |    |      |    |       |   |     |
|------------------------|-----|--------|----|------|----|------|----|-------|---|-----|
| Bivalirudin            | 2   | 126    |    |      | 2  | 126  |    |       |   |     |
| Rosuvastatin           | 2   | 194    | 1  | 18   |    |      | 1  | 176   |   |     |
| Candesartan            | 5   | 598    | 2  | 32   |    |      | 3  | 566   |   |     |
| Olopatadine            | 2   | 1320   |    |      | 1  | 132  | 1  | 1188  |   |     |
| Levocetirizine         | 2   | 242    |    |      |    |      | 2  | 242   |   |     |
| Tamsulosin             | 2   | 250    |    |      | 1  | 88   | 1  | 162   |   |     |
| Famciclovir            | 3   | 69     | 1  | 18   |    |      | 2  | 51    |   |     |
| Olmesartan             | 3   | 412    | 2  | 50   |    |      | 1  | 362   |   |     |
| Docetaxel              | 4   | 343    | 2  | 90   | 2  | 253  |    |       |   |     |
| Alfuzosin              | 3   | 226    | 1  | 29   |    |      | 2  | 197   |   |     |
| Saquinavir             | 3   | 90     |    |      | 1  | 18   | 1  | 22    | 1 | 50  |
| Nitric Oxide           | 2   | 1387   |    |      |    |      | 2  | 1387  |   |     |
| Pemetrexed             | 2   | 105    | 1  | 33   | 1  | 72   |    |       |   |     |
| Loteprednol/Tobramycin | 1   | 137    |    |      |    |      |    |       | 1 | 137 |
| Paliperidone           | 3   | 508    | 1  | 25   |    |      | 2  | 483   |   |     |
| Clopidogrel            | 2   | 998    |    |      | 1  | 92   | 1  | 906   |   |     |
| Fulvestrant            | 1   | 30     |    |      | 1  | 30   |    |       |   |     |
| Ixabepilone            | 2   | 82     | 1  | 21   | 1  | 61   |    |       |   |     |
| Darunavir              | 1   | 27     |    |      | 1  | 27   |    |       |   |     |
| Tenofovir              | 2   | 129    | 1  | 32   |    |      | 1  | 97    |   |     |
| Rizatriptan            | 3   | 1173   | 1  | 30   |    |      | 2  | 1143  |   |     |
| Fosamprenavir          | 2   | 163    |    |      | 2  | 163  |    |       |   |     |
| Sildenafil             | 1   | 235    |    |      |    |      | 1  | 235   |   |     |
| Temsirolimus           | 2   | 71     | 1  | 19   | 1  | 52   |    |       |   |     |
| Bendamustine           | 2   | 43     | 1  | 11   | 1  | 32   |    |       |   |     |
| Eszopiclone            | 4   | 674    | 2  | 85   |    |      | 2  | 589   |   |     |
| Duloxetine             | 3   | 872    |    |      | 1  | 72   | 2  | 800   |   |     |
| Everolimus             | 1   | 28     |    |      | 1  | 28   |    |       |   |     |
| Rabeprazole            | 2   | 135    | 1  | 24   | 1  | 111  |    |       |   |     |
| TOTALS                 | 141 | 20 240 | 41 | 1249 | 32 | 2019 | 65 | 16591 | 3 | 381 |

**eTable 5: Pediatric Exclusivity grants, Food and Drug Administration, September 27, 2007 – December 31, 2012**

| Drug                       | Brand Name  | NDA Approval Date | Date Pediatric Exclusivity Granted | Pediatric Studies Mandated Under PREA? | Pediatric Trials Sponsor        | Indications Tested in Pediatric Populations                                                                                            | New or Extended Indication in Children?        | Disease Category                      | Estimated Date of Generic Entry |
|----------------------------|-------------|-------------------|------------------------------------|----------------------------------------|---------------------------------|----------------------------------------------------------------------------------------------------------------------------------------|------------------------------------------------|---------------------------------------|---------------------------------|
| Eplerenone                 | Inspira     | 9/27/2002         | 10/24/2007                         | Yes                                    | Pfizer                          | Hypertension                                                                                                                           | No                                             | Cardiovascular / Circulatory          | 6/8/2020                        |
| Anastrozole                | Arimidex    | 12/27/1995        | 11/14/2007                         | No                                     | AstraZeneca                     | Male pubertal patients with gynecomastia, female pediatric patients with McCune-Albright syndrome with progressive precocious puberty. | No                                             | Oncology                              | 6/27/2010                       |
| Aripiprazole               | Abilify     | 11/15/2002        | 11/14/2007                         | Yes                                    | Otsuka (& Bristol-Myers Squibb) | Schizophrenia in adolescents; Bipolar mania in children and adolescents                                                                | Yes                                            | Central Nervous System / Brain / Pain | 4/20/2015                       |
| Divalproex                 | Depakote ER | 9/12/1989         | 12/14/2007                         | Yes                                    | Abbott                          | Migraine, Bipolar disorder, Epilepsy                                                                                                   | Yes for partial seizures, no for mania/bipolar | Central Nervous System / Brain / Pain | 7/29/2008                       |
| Zoledronic acid            | Zometa      | 3/7/2003          | 12/21/2007                         | No                                     | Novartis                        | Severe osteogenesis imperfecta                                                                                                         | No                                             | Diabetes / Metabolic / Nutrition      | 3/2/2013                        |
| Technetium Tc99m sestamibi | Cardiolite  | 12/21/1990        | 1/11/2008                          | No                                     | Bristol-Myers Squibb            | Kawasaki's disease                                                                                                                     | No                                             | Other                                 | 7/29/2008                       |
| Ezetimibe                  | Zetia       | 10/25/2002        | 2/14/2008                          | Yes                                    | MSP Singapore                   | Heterozygous familial hypercholesterolemia                                                                                             | Yes                                            | Diabetes / Metabolic / Nutrition      | 4/25/2017                       |
| Valacyclovir               | Valtrex     | 6/23/1995         | 2/28/2008                          | Yes                                    | GlaxoSmithKline                 | Herpes simplex virus infection                                                                                                         | Yes                                            | Infectious                            | 12/23/2009                      |
| Lopinavir/Ritonavir        | Kaletra     | 9/15/2000         | 3/7/2008                           | Yes                                    | Abbott                          | HIV                                                                                                                                    | Yes                                            | Infectious                            | 12/26/2016                      |
| Tipranavir                 | Aptivus     | 6/22/2005         | 3/7/2008                           | Yes                                    | Boehringer Ingelheim            | HIV                                                                                                                                    | Yes                                            | Infectious                            | 4/29/2020                       |
| Rocuronium                 | Zemuron     | 3/17/1994         | 4/3/2008                           | Yes                                    | Organon                         | Anesthesia                                                                                                                             | Yes                                            | Other                                 | 2/28/2012                       |

|                |              |            |           |     |                                            |                                                                                                                                                                                     |                                           |                                       |            |
|----------------|--------------|------------|-----------|-----|--------------------------------------------|-------------------------------------------------------------------------------------------------------------------------------------------------------------------------------------|-------------------------------------------|---------------------------------------|------------|
| Caspofungin    | Cancidas     | 1/26/2001  | 4/15/2008 | Yes | Merck & Co                                 | Fungal Infections                                                                                                                                                                   | Yes                                       | Infectious                            | 9/28/2017  |
| Levetiracetam  | Keppra       | 7/15/2003  | 6/3/2008  | Yes | UCB Inc.                                   | Partial seizures                                                                                                                                                                    | Yes                                       | Central Nervous System / Brain / Pain | 7/14/2009  |
| Lansoprazole   | Prevacid     | 5/10/1995  | 7/15/2008 | Yes | Tap Pharmaceutical Products, Inc.          | Treatment of GERD in infants                                                                                                                                                        | Yes                                       | Other                                 | 11/10/2009 |
| Topiramate     | Topamax      | 12/24/1996 | 7/24/2008 | No  | Ortho-McNeil-Janssen Pharmaceuticals, Inc. | - Mono- and adjunctive therapy for partial onset or primary generalized tonic-clonic seizures (epilepsy)<br>- Adjunctive therapy for seizures associated w/ Lennox-Gastaut syndrome | No                                        | Central Nervous System / Brain / Pain | 3/26/2009  |
| Valganciclovir | Valcyte      | 3/29/2001  | 7/24/2008 | Yes | Hoffman-La Roche Inc.                      | Treatment & prevention of Cytomegalovirus (CMV) Disease                                                                                                                             | Yes                                       | Infectious                            | 9/29/2015  |
| Albuterol      | Ventolin HFA | 4/19/2001  | 8/27/2008 | No  | GlaxoSmithKline                            | Treatment and prevention of bronchospasm in children from birth to <4 years of age with obstructive airway disease                                                                  | No                                        | Respiratory                           | 8/26/2026  |
| Bicalutamide   | Casodex      | 10/4/1995  | 9/19/2008 | No  | AstraZeneca                                | Treatment of gonadotropin-independent precocious puberty in boys with testotoxicosis                                                                                                | No                                        | Oncology                              | 4/1/2009   |
| Almotriptan    | Axert        | 5/7/2001   | 1/13/2009 | No  | Johnson & Johnson                          | Acute treatment of migraine headache in adolescents, ages 12 to 17 years                                                                                                            | Yes (no for migraine-associated symptoms) | Central Nervous System / Brain / Pain | 11/7/2015  |

|              |          |            |           |     |                       |                                                                                                                                 |                                          |                                       |            |
|--------------|----------|------------|-----------|-----|-----------------------|---------------------------------------------------------------------------------------------------------------------------------|------------------------------------------|---------------------------------------|------------|
| Quetiapine   | Seroquel | 9/26/1997  | 1/23/2009 | Yes | AstraZeneca           | Treatment of schizophrenia and bipolar mania in pediatric patients                                                              | Yes (schizophrenia 13-17, bipolar 10-17) | Central Nervous System / Brain / Pain | 6/2/2013   |
| Colesevelam  | Welchol  | 5/26/2000  | 2/17/2009 | Yes | Daiichi Sankyo        | Treatment of patients diagnosed with heterozygous familial hypercholesterolemia (heFH)                                          | Yes                                      | Diabetes/Metabolic/Nutrition          | 10/17/2022 |
| Pantoprazole | Protonix | 2/2/2000   | 2/17/2009 | Yes | Wyeth                 | Short-term treatment of Symptomatic GERD in pediatric patients                                                                  | Yes                                      | Other                                 | 1/19/2011  |
| Risedronate  | Actonel  | 3/27/1998  | 4/24/2009 | No  | Procter & Gamble      | Prevent vertebral and non-vertebral fractures in children with moderate-to-severe osteogenesis imperfecta (OI)                  | No                                       | Diabetes / Metabolic / Nutrition      | 6/10/2014  |
| Esomeprazole | Nexium   | 2/20/2001  | 5/1/2009  | Yes | AstraZeneca           | Treatment of gastroesophageal reflux disease (GERD)                                                                             | No                                       | Other                                 | 8/3/2015   |
| Gatifloxacin | Zymar    | 3/28/2003  | 5/19/2009 | No  | Allergan              | Treatment of bacterial conjunctivitis in infants 0 - 1 month of age                                                             | Yes                                      | Infectious                            | 10/3/2013  |
| Bivalirudin  | Angiomax | 12/15/2000 | 6/17/2009 | No  | The Medicines Company | Use as an anticoagulant in children during percutaneous intravascular procedures for the management of congenital heart disease | No                                       | Hematology                            | 6/15/2015  |
| Rosuvastatin | Crestor  | 8/12/2003  | 7/7/2009  | Yes | AstraZeneca           | Adjunct to diet to reduce cholesterol and ApoB levels in children 10-17 years of age                                            | Yes                                      | Diabetes / Metabolic / Nutrition      | 5/2/2016   |
| Candesartan  | Atacand  | 6/4/1998   | 7/20/2009 | No  | AstraZeneca           | Reduce blood pressure                                                                                                           | Yes                                      | Cardiovascular / Circulatory          | 12/4/2012  |

|                |           |            |            |     |                       |                                                                                                                                                |     |                              |            |
|----------------|-----------|------------|------------|-----|-----------------------|------------------------------------------------------------------------------------------------------------------------------------------------|-----|------------------------------|------------|
| Olopatadine    | Patanol   | 12/18/1996 | 8/12/2009  | Yes | Alcon                 | Allergic rhinitis                                                                                                                              | Yes | Other                        | 12/6/2015  |
| Levocetirizine | Xyzal     | 5/25/2007  | 8/25/2009  | Yes | UCB Inc.              | Treatment of allergic rhinitis and urticaria in children 6 months to < 6 years of age                                                          | Yes | Other                        | 11/25/2010 |
| Tamsulosin     | Flomax    | 4/15/1997  | 9/17/2009  | No  | Boehringer Ingelheim  | Treatment of 2 – 16 year olds w/ elevated detrusor leak point pressure associated w/ a known neurological disorder (e.g., spina bifida)        | No  | Other                        | 4/27/2010  |
| Famciclovir    | Famvir    | 6/29/1994  | 9/21/2009  | Yes | Novartis              | Treatment of children 1 month – 12 years of age w/ herpes simplex (HSV) & 1 – 12 years w/ varicella zoster (VSV)                               | No  | Infectious                   | 3/21/2011  |
| Olmesartan     | Benicar   | 4/25/2002  | 10/7/2009  | Yes | Daiichi Sankyo        | Treatment of hypertension in pediatric patients 1 – 16 years of age                                                                            | Yes | Cardiovascular / Circulatory | 10/25/2016 |
| Docetaxel      | Taxotere  | 5/14/1996  | 3/17/2010  | No  | Sanofi Aventis        | Solid Tumors                                                                                                                                   | No  | Oncology                     | 3/28/2011  |
| Alfuzosin      | Uroxatral | 6/12/2003  | 9/7/2010   | No  | Sanofi Aventis        | Treatment of patients 2 - 16 yrs with elevated detrusor leak point pressure associated with a known neurological disorder (e.g., spina bifida) | No  | Other                        | 7/8/2011   |
| Saquinavir     | Fortovase | 11/7/1997  | 10/26/2010 | Yes | Hoffman-La Roche Inc. | Treatment of HIV infection in pediatric patients in combination with other antiretroviral agents                                               | Yes | Infectious                   | 5/16/2020  |



|                         |          |            |            |     |                      |                                                                                                                                                                                   |     |                                       |           |
|-------------------------|----------|------------|------------|-----|----------------------|-----------------------------------------------------------------------------------------------------------------------------------------------------------------------------------|-----|---------------------------------------|-----------|
| Nitric Oxide            | INOmax   | 12/23/1999 | 11/2/2010  | No  | INO Therapeutics     | Provide ventilatory assistance to preterm neonates with respiratory distress and reduce the risk of chronic lung disease (CLD) in preterm neonates at high risk of developing CLD | No  | Respiratory                           | 7/6/2031  |
| Pemetrexed              | Alimta   | 2/4/2004   | 12/3/2010  | No  | Eli Lilly            | Treatment of pediatric patients with refractory and recurrent solid tumors, including osteosarcoma, Ewing sarcoma/peripheral PNET, rhabdomyosarcoma, and neuroblastoma            | No  | Oncology                              | 1/24/2017 |
| Loteprednol /Tobramycin | Zylet    | 12/14/2004 | 12/28/2010 | Yes | Bausch & Lomb        | Treatment of superficial bacterial ocular infection                                                                                                                               | No  | Infectious                            | 9/9/2012  |
| Paliperidone            | Invega   | 12/19/2006 | 1/5/2011   | Yes | Ortho-McNeil-Janssen | Treatment of adolescent schizophrenia                                                                                                                                             | Yes | Central Nervous System / Brain / Pain | 9/25/2015 |
| Clopidogrel             | Plavix   | 11/17/1997 | 1/20/2011  | No  | Sanofi-Aventis       | Reduction of the incidence of thrombosis in children with systemic to pulmonary artery shunts for palliation of cyanotic congenital heart disease                                 | No  | Hematology                            | 5/17/2012 |
| Fulvestrant             | Faslodex | 4/25/2002  | 2/1/2011   | No  | AstraZeneca          | Treatment of progressive precocious puberty in girls with McCune-Albright Syndrome                                                                                                | No  | Other                                 | 7/9/2021  |
| Ixabepilone             | Ixempra  | 10/16/2007 | 4/5/2011   | No  | Bristol-Myers Squibb | Solid tumors                                                                                                                                                                      | No  | Oncology                              | 2/21/2025 |

|               |          |            |           |     |           |                                                                                                                 |     |                                       |            |
|---------------|----------|------------|-----------|-----|-----------|-----------------------------------------------------------------------------------------------------------------|-----|---------------------------------------|------------|
| Darunavir     | Prezista | 6/23/2006  | 6/7/2011  | Yes | Tibotec   | HIV                                                                                                             | Yes | Infectious                            | 8/16/2024  |
| Tenofovir     | Viread   | 10/26/2001 | 9/6/2011  | Yes | Gilead    | HIV                                                                                                             | Yes | Infectious                            | 1/25/2018  |
| Rizatriptan   | Maxalt   | 6/29/1998  | 9/20/2011 | No  | Merck     | Migraine headaches                                                                                              | Yes | Central Nervous System / Brain / Pain | 12/29/2012 |
| Fosamprenavir | Lexiva   | 10/20/2003 | 1/10/2012 | Yes | ViiV      | HIV                                                                                                             | Yes | Infectious                            | 10/27/2015 |
| Sildenafil    | Viagra   | 3/27/1998  | 2/9/2012  | Yes | Pfizer    | Treatment of pulmonary arterial hypertension (PAH)                                                              | No  | Cardiovascular / Circulatory          | 12/11/2017 |
| Temsirolimus  | Torisel  | 5/30/2007  | 2/28/2012 | No  | Pfizer    | Treatment of relapsed/refractory solid tumors                                                                   | No  | Oncology                              | 11/10/2032 |
| Bendamustine  | Treanda  | 3/20/2008  | 5/24/2012 | No  | Cephalon  | Relapsed or refractory acute leukemia                                                                           | No  | Oncology                              | 4/26/2031  |
| Eszopiclone   | Lunesta  | 12/15/2004 | 6/29/2012 | Yes | Sunovion  | Insomnia in children with ADHD                                                                                  | No  | Central Nervous System / Brain / Pain | 8/14/2014  |
| Duloxetine    | Cymbalta | 8/3/2004   | 7/2/2012  | Yes | Eli Lilly | Major depressive disorder (MDD)                                                                                 | No  | Central Nervous System / Brain / Pain | 12/11/2013 |
| Everolimus    | Afinitor | 3/30/2009  | 7/10/2012 | No  | Novartis  | Treatment of patients with tuberous sclerosis complex (TSC) who have subependymal giant cell astrocytoma (SEGA) | Yes | Oncology                              | 3/9/2020   |
| Rabeprazole   | Aciphex  | 8/12/2005  | 12/4/2012 | Yes | Eisai     | Healing & maintenance of healing of GERD & improvement of GERD symptoms in children 1 to 11 years of age        | Yes | Other                                 | 11/8/2013  |

**eTable 6: Estimated Cost to Consumers (Net Return) and Ratio of Net Return to Cost of Investment for 48 Pediatric Exclusivity Extensions with Revenue Data (Listed in Order of Pediatric Exclusivity Grant Date)**

| Drug                       | Pediatric Exclusivity Grant Date | Cost of Investment (\$ millions)* | Cost to Consumers (Net Return) (\$ millions)* | Ratio of Net Return to Cost of Investment (%)** |
|----------------------------|----------------------------------|-----------------------------------|-----------------------------------------------|-------------------------------------------------|
| Eplerenone                 | 10/24/2007                       | 161.8                             | -85.1                                         | -50%                                            |
| Anastrozole                | 11/14/2007                       | 45.6                              | 277.1                                         | 610%                                            |
| Aripiprazole               | 11/14/2007                       | 325.9                             | 189.1                                         | 60%                                             |
| Divalproex                 | 12/14/2007                       | 78.1                              | 491.0                                         | 630%                                            |
| Zoledronic acid            | 12/21/2007                       | 16.8                              | 208.8                                         | 1250%                                           |
| Technetium Tc99m sestamibi | 1/11/2008                        | 109.1                             | 44.7                                          | 40%                                             |
| Ezetimibe                  | 2/14/2008                        | 44.2                              | 496.4                                         | 1120%                                           |
| Valacyclovir               | 2/28/2008                        | 7.9                               | 498.2                                         | 6320%                                           |
| Lopinavir/ Ritonavir       | 3/7/2008                         | 6.9                               | 47.7                                          | 690%                                            |
| Tipranavir                 | 3/7/2008                         | 17.6                              | -                                             | -                                               |
| Rocuronium                 | 4/3/2008                         | 55.5                              | -                                             | -                                               |
| Caspofungin                | 4/15/2008                        | 22.3                              | 159.2                                         | 710%                                            |
| Levetiracetam              | 6/3/2008                         | 75.2                              | 343.2                                         | 460%                                            |
| Lansoprazole               | 7/15/2008                        | 24.5                              | 1199.3                                        | 4900%                                           |
| Topiramate                 | 7/24/2008                        | 81.7                              | 762.7                                         | 930%                                            |
| Valganciclovir             | 7/24/2008                        | 10.0                              | 132.0                                         | 1320%                                           |
| Albuterol                  | 8/27/2008                        | 162.4                             | 38.7                                          | 20%                                             |
| Bicalutamide               | 9/19/2008                        | 2.9                               | 108.9                                         | 3720%                                           |
| Almotriptan                | 1/13/2009                        | 375.9                             | -366.1                                        | -100%                                           |
| Quetiapine                 | 1/23/2009                        | 318.0                             | 1124.5                                        | 350%                                            |
| Colesevelam                | 2/17/2009                        | 16.8                              | 121.6                                         | 730%                                            |
| Pantoprazole               | 2/17/2009                        | 82.2                              | 168.9                                         | 210%                                            |
| Risedronate                | 4/24/2009                        | 23.3                              | 155.2                                         | 670%                                            |
| Esomeprazole               | 5/1/2009                         | 35.7                              | 597.2                                         | 1670%                                           |
| Gatifloxacin               | 5/19/2009                        | 16.6                              | 5.1                                           | 30%                                             |
| Bivalirudin                | 6/17/2009                        | 22.6                              | 183.2                                         | 810%                                            |
| Rosuvastatin               | 7/7/2009                         | 27.2                              | 920.4                                         | 3390%                                           |
| Candesartan                | 7/20/2009                        | 78.5                              | -14.3                                         | -20%                                            |
| Olopatadine                | 8/12/2009                        | 303.6                             | -224.8                                        | -70%                                            |
| Levocetirizine             | 8/25/2009                        | 30.7                              | 14.5                                          | 50%                                             |
| Tamsulosin                 | 9/17/2009                        | 33.5                              | 766.1                                         | 2280%                                           |
| Famciclovir                | 9/21/2009                        | 4.8                               | 67.1                                          | 1400%                                           |
| Olmesartan                 | 10/7/2009                        | 63.9                              | 266.6                                         | 420%                                            |
| Docetaxel                  | 3/17/2010                        | 83.7                              | 318.1                                         | 380%                                            |

|                            |               |             |              |              |
|----------------------------|---------------|-------------|--------------|--------------|
| Alfuzosin                  | 9/7/2010      | 29.7        | 50.5         | 170%         |
| Saquinavir                 | 10/26/2010    | 8.4         | -            | -            |
| Nitric Oxide               | 11/2/2010     | 1006.4      | -850.1       | -80%         |
| Pemetrexed                 | 12/3/2010     | 36.8        | 325.5        | 880%         |
| Loteprednol<br>/Tobramycin | 12/28/2010    | 3.5         | -            | -            |
| Paliperidone               | 1/5/2011      | 106.2       | 15.0         | 10%          |
| Clopidogrel                | 1/20/2011     | 143.7       | 2217.0       | 1540%        |
| Fulvestrant                | 2/1/2011      | 12.6        | 131.8        | 1050%        |
| Ixabepilone                | 4/5/2011      | 61.9        | -            | -            |
| Darunavir                  | 6/7/2011      | 6.7         | 368.9        | 5550%        |
| Tenofovir                  | 9/6/2011      | 13.6        | 377.1        | 2770%        |
| Rizatriptan                | 9/20/2011     | 193.4       | -20.4        | -10%         |
| Fosamprenavir              | 1/10/2012     | 13.7        | 11.3         | 80%          |
| Sildenafil                 | 2/9/2012      | 35.9        | 353.2        | 980%         |
| Temsirolimus               | 2/28/2012     | 109.4       | -            | -            |
| Bendamustine               | 5/24/2012     | 56.1        | 161.6        | 290%         |
| Eszopiclone                | 6/29/2012     | 123.5       | 184.9        | 150%         |
| Duloxetine                 | 7/2/2012      | 160.3       | 1198.3       | 750%         |
| Everolimus                 | 7/10/2012     | 14.6        | 484.9        | 3320%        |
| Rabeprazole                | 12/4/2012     | 16.1        | 113.1        | 700%         |
|                            | <b>Median</b> | <b>36.4</b> | <b>176.0</b> | <b>680%</b>  |
|                            | <b>Mean</b>   | <b>91.1</b> | <b>294.5</b> | <b>1110%</b> |

\* In 2017 dollars, rounded to nearest hundred thousand

\*\* Rounded to the nearest 10%
